# Supplementary material for: Spatio-Temporal Dynamics of Exploited Groundfish Species Assemblages Faced to Environmental and Fishing Forcings: Insights from the Mauritanian Exclusive Economic Zone
Source: PLoS One. 2015 Oct 27;10(10):e0141566. doi: 10.1371/journal.pone.0141566 (PMC4623501; doi:10.1371/journal.pone.0141566)
Supplement: S2 Text — (DOCX) [file pone.0141566.s003.docx]

**S2 Text**: **Fish assemblages, with species list, identified by mean of average linkage classification (UPGMA), with their sedimentary types and depth stratum (CS: Coastal, US: Upper shelf, MS: Mid-shelf and OS: Outer shelf).**

| Depth strata | Sedimentary types | Taxonomic names | Family |
| --- | --- | --- | --- |
| CS | Muddy | *Merluccius senegalensis* | Merlucciudae |
| *Pseudotolithus senegalensis* | Sciaenidae |
| Rocky | *Capros aper* | Caproidae |
| *Merluccius polli* | Merlucciudae |
| *Scorpaena elongata* | Scorpaenidae |
| *Helicolenus dactylopterus* |
| *Pontinus kuhlii* |
| *Lepidotrigla cadmani* | Triglidae |
| Sandy | *Pterothrissus belloci* | Albulidae |
| *Arnoglossus imperialis* | Bothidae |
| *Chlorophthalmus atlanticus* | Chlorophthalmidae |
| *Gobiidae* | Gobiidae |
| *Gymnura altavela* | Gymnuridae |
| *Branchiostegus semifasciatus* | Malacanthidae |
| *Psettodes belcheri* | Psettodidae |
| *Raja straeleni* | Rajidae |
| *Raja undulata* |
| *Rhinobatos rhinobatos* | Rhinobatidae |
| *Scorpaena normani* | Scorpaenidae |
| *Scorpaena stephanica* |
| *Serranus cabrilla* | Serranidae |
| *Microchirus theophila* | Soleidae |
| US | Sandy | *Dentex angolensis* | Sparidae |
| *Diplodus sargus* |
| *Mustelus mustelus* | Triakidae |
| *Uranoscopus polli* | Uranoscopidae |
| Sand-muddy | *Cynoglossus* spp. | Cynoglossidae |
| *Grammoplites gruveli* | Platycephalidae |
| *Umbrina canariensis* | Sciaenidae |
| *Microchirus boscanion* | Soleidae |
| *Dicologoglossa cuneata* |
| *Trachinus draco* | Trachinidae |
| Muddy | *Priacanthus arenatus* | Priacanthidae |
| *Zanobatus schoenleinii* | Rhinobatidae |
| Rocky | *Selene dorsalis* | Carangidae |
| *Fistularia petimba* | Fistulariidae |

To be continued

| **Depth strata** | **Sedimentary types** | **Taxonomic names** | **Family** |
| --- | --- | --- | --- |
| US | Sandy | *Dasyatis marmorata* | Dasyatidae |
| *Pomadasys incisus* | Haemulidae |
| *Pomadasys jubelini* |
| *Leptocharias smithii* | Leptochariidae |
| *Boops boops* | Sparidae |
| *Pagellus bellottii* |
| *Chelidonichthys gabonensis* | Triglidae |
| Sand-muddy | *Galeoides decadactylus* | Polynemidae |
| MS | Sandy | *Halobatrachus didactylus* | Batrachoididae |
| *Bothus podas* | Bothidae |
| *Chaetodon hoefleri* | Chaetodontidae |
| *Citharus linguatula*  *Dactylopterus volitans* | Citharidae  Dactylopteridae |
| *Fistularia tabacaria* | Fistulariidae |
| *Eucinostomus melanopterus* | Gereidae |
| *Plectorhinchus mediterraneus* | Haemulidae |
| *Stephanolepis hispidus* | Monacanthidae |
| *Brotula barbata* | Ophidiidae |
| *Rhinobatos* spp. | Rhinobatidae |
| *Scorpaena angolensis* | Scorpaenidae |
| *Scorpaena* spp. |
| *Scyliorhinus canicula* | Scyliorhinidae |
| *Epinephelus alexandrinus* | Serranidae |
| *Epinephelus aeneus* |
| *Serranus scriba* |
| *Solea senegalensis* | Soleidae |
| *Lithognathus mormyrus* | Sparidae |
| *Uranoscopus* spp. | Uranoscopidae |
| Sand-muddy | *Dentex maroccanus* | Sparidae |
| OS | Sandy | *Pseudupeneus prayensis* | Mullidae |
| *Raja miraletus* | Rajidae |
| *Dentex canariensis* | Sparidae |
| Sand-muddy | *Chilomycterus orbicularis* | Diodontidae |
| *Sphoeroides spengleri* | Tetraodontidae |
| *Torpedo torpedo* | Torpedinidae |
